# Supplementary material for: Immobilizing an organic electrode material through π–π interaction for high-performance Li-organic batteries
Source: Royal Society of Chemistry journal article supplement (doi:10.1039/c9ta07403a), 2019-01-01
Supplement: c9ta07403a1.pdf [file c9ta07403a1.pdf]

## Supporting Information

### Immobilizing Organic Electrode Material through $\pi$ - $\pi$ Interaction for High-Performance Li-Organic Batteries

Chun Fang,<sup>a</sup> Zhao Ye,<sup>a</sup> Yanjie Wang,<sup>b</sup> Xiaolin Zhao,<sup>c</sup> Ying Huang,<sup>b</sup> Ruirui Zhao,<sup>b</sup> Jianjun Liu,<sup>c</sup>  
Jiantao Han\*<sup>a</sup> and Yunhui Huang\*<sup>ab</sup>

<sup>a</sup> State Key Laboratory of Material Processing and Die & Mould Technology, School of Materials Science and Engineering Huazhong University of Science and Technology, Wuhan, Hubei 430074, China. E-mail: [jthan@hust.edu.cn](mailto:jthan@hust.edu.cn), [huangyh@hust.edu.cn](mailto:huangyh@hust.edu.cn)

<sup>b</sup> Institute of New Energy for Vehicles, School of Materials Science and Engineering Tongji University, Shanghai 201804, China. E-mail: [huangyh@tongji.edu.cn](mailto:huangyh@tongji.edu.cn)

<sup>c</sup> State Key Laboratory of High Performance Ceramics and Superfine Microstructure, Shanghai institute of Ceramics, Chinese Academy of Sciences, 1295 Dingxi Road, Shanghai 200050, China

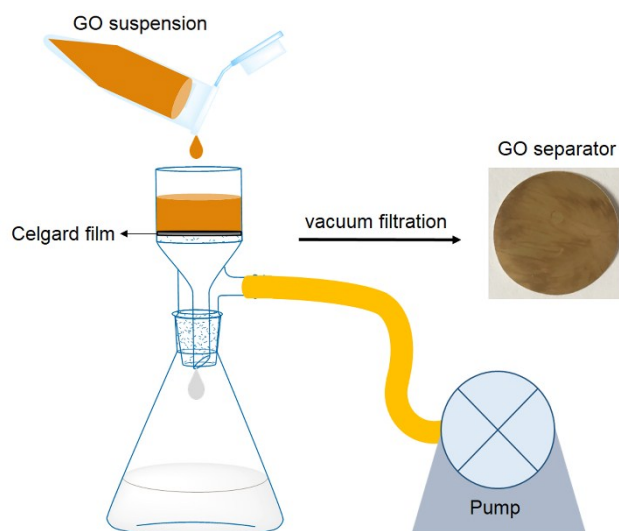

Fig. S1 Illustration of deposition process of GO separator.

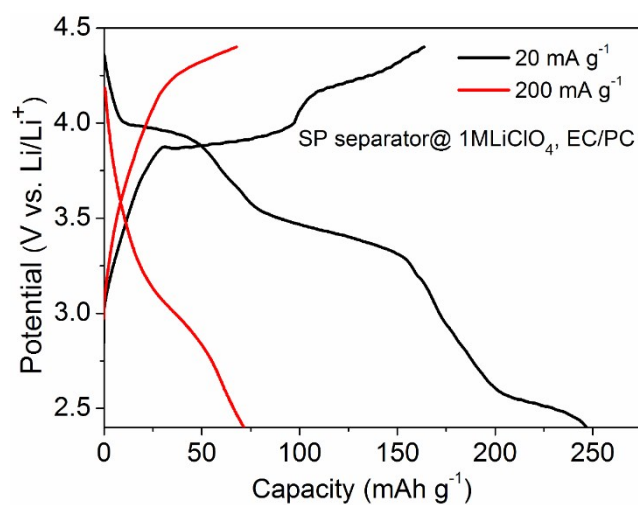

Fig. S2 Charge-discharge curves of first cycle for the CuTCNQ based cell with SP separator in the EC/PC electrolyte of 1 M  $\text{LiClO}_4$  within the voltage range from 2.4 to 4.4 V vs.  $\text{Li}^+/\text{Li}$  at current densities of 20 and  $200 \text{ mA g}^{-1}$ .

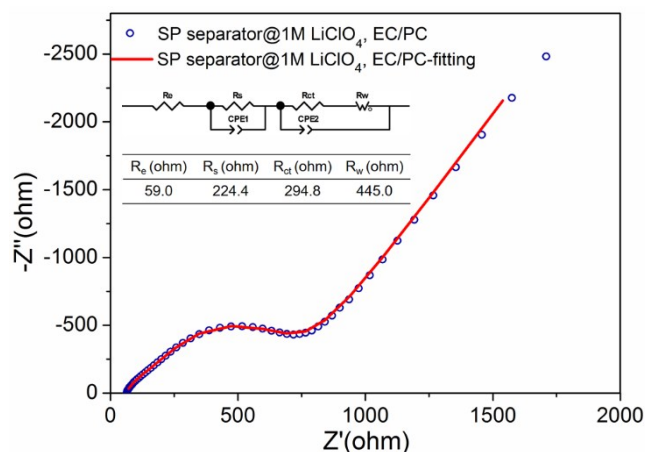

Fig. S3 EIS curve of the fresh CuTCNQ cell with SP separator in EC/PC electrolyte of 1 M LiClO<sub>4</sub>. Inset: EIS equivalent circuit and the fitted resistance values.

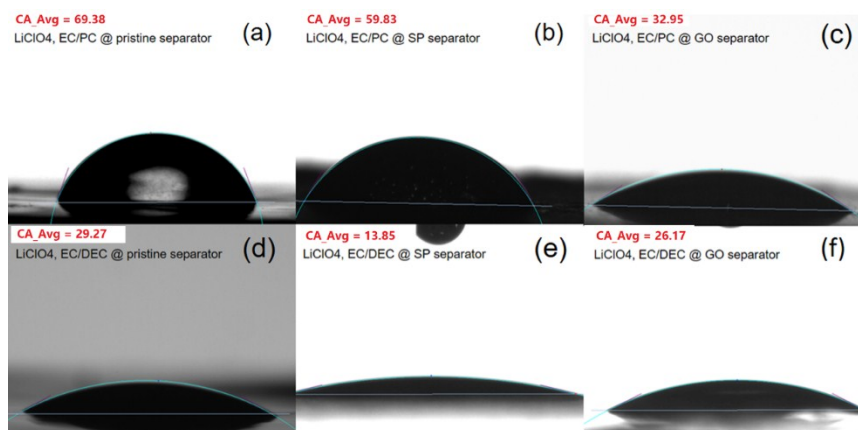

Fig. S4 Contact angle images of droplets: (a, b, c) 1 M LiClO<sub>4</sub> in EC/PC electrolyte and (d, e, f) 1 M LiClO<sub>4</sub> in EC/DEC electrolyte on (a, d) pristine Celgard separators, (b, e) SP separators and (c, f) GO separators.

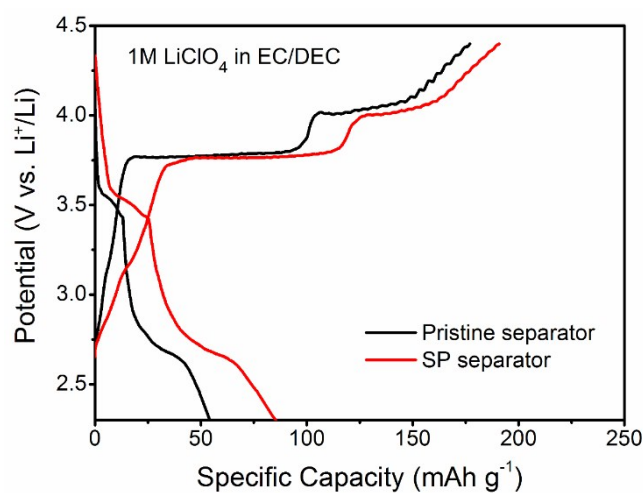

Fig. S5 Charge-discharge curves of CuTCNQ in the voltage range from 2.4 to 4.4 V vs. Li<sup>+</sup>/Li at a current density of 50 mA g<sup>-1</sup>.

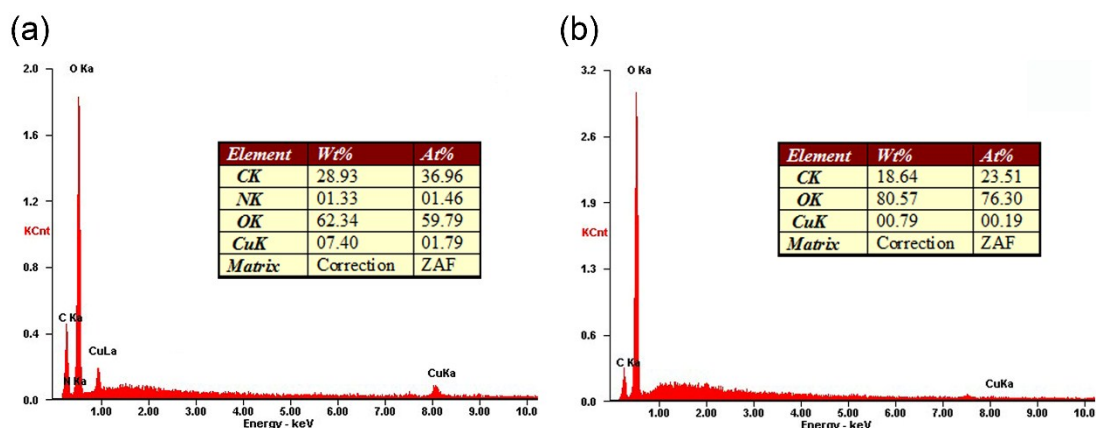

Fig. S6 EDX spectra and elemental contents of Li metal surface assembled in CuTCNQ cells (a) without and (b) with GO separators.

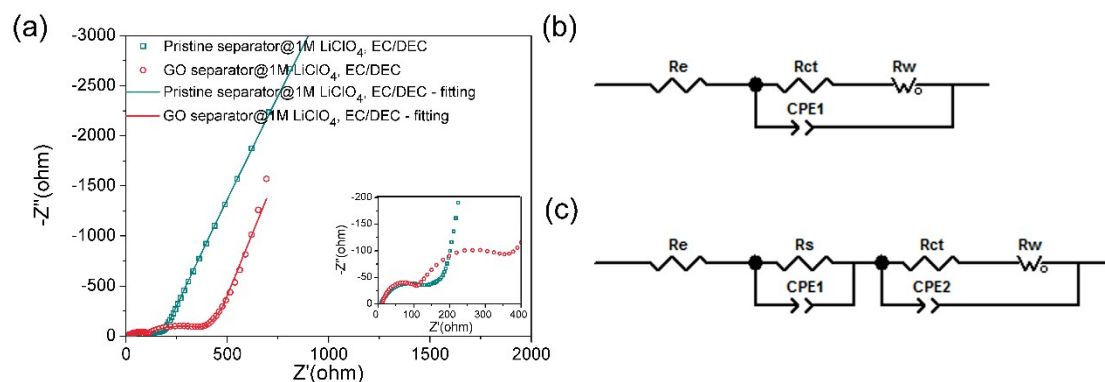

Fig. S7 (a) EIS curves of the fresh CuTCNQ cell with pristine separator and GO separator in EC/DEC electrolyte of 1 M LiClO<sub>4</sub>. (b, c) Equivalent circuits of the EIS curve of (b) pristine PP film separated cell and (c) GO film separated cell.

Table S1. Fitted resistance parameters ( $R_e$ ,  $R_s$ ,  $R_{ct}$ ,  $R_w$ ) for CuTCNQ cell with pristine separator and GO separator in EC/DEC electrolyte of 1 M LiClO<sub>4</sub>.

| Samples                                         | $R_e$ (ohm) | $R_s$ (ohm) | $R_{ct}$ (ohm) | $R_w$ (ohm) |
|-------------------------------------------------|-------------|-------------|----------------|-------------|
| Pristine separator @ LiClO <sub>4</sub> -EC/DEC | 8.0         | --          | 131.6          | 166.9       |
| GO separator @LiClO <sub>4</sub> -EC/DEC        | 11.5        | 109.5       | 182.8          | 279.6       |
